# Supplementary material
Source: PubMed Central journal article supplement (PMC6384165)

# Figure S1

**A**

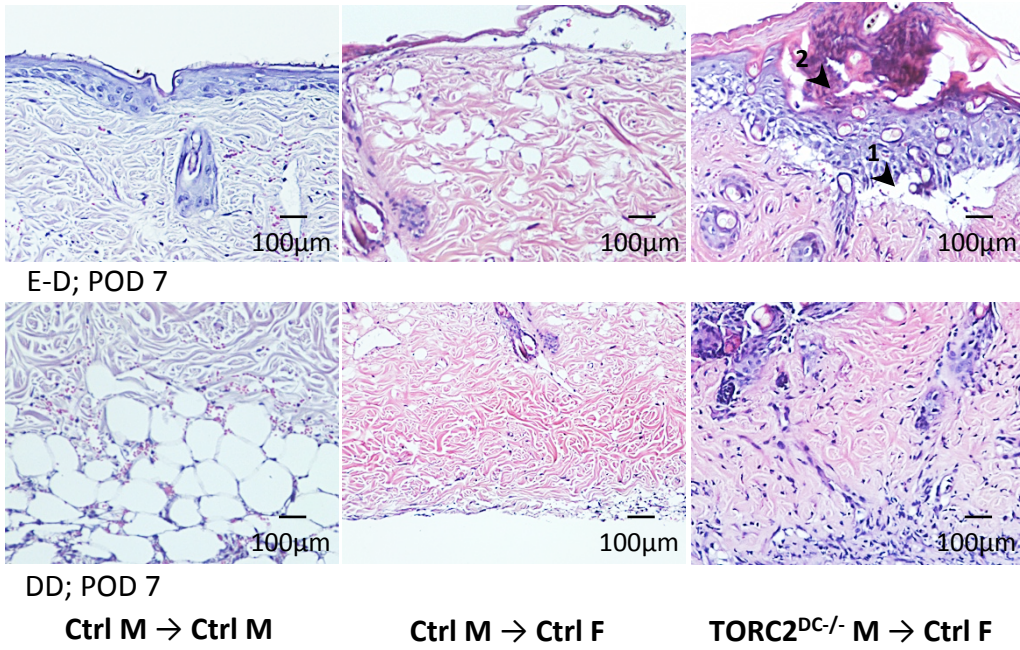

**B**

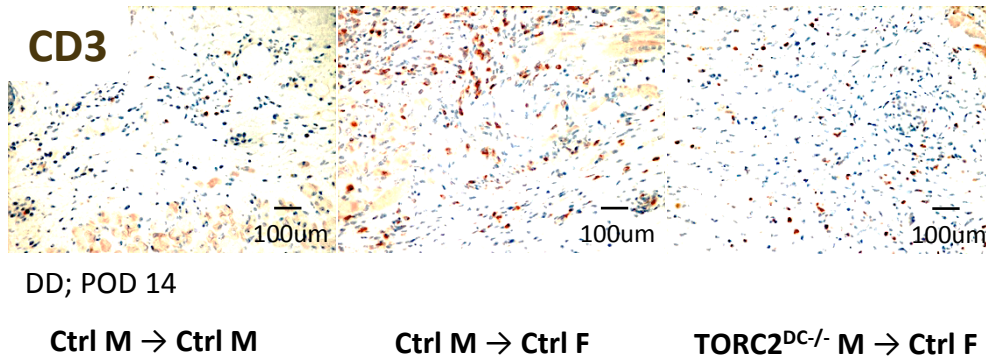

**C**

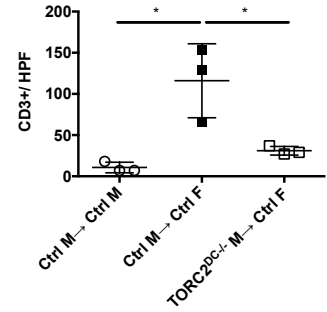

**D**

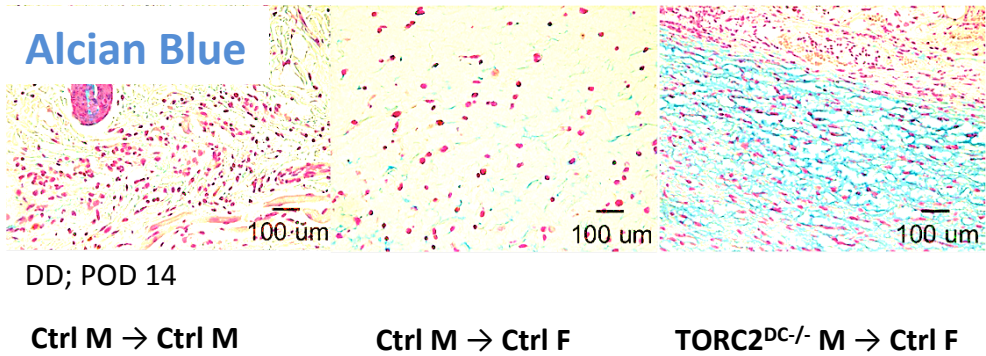







# Figure S4

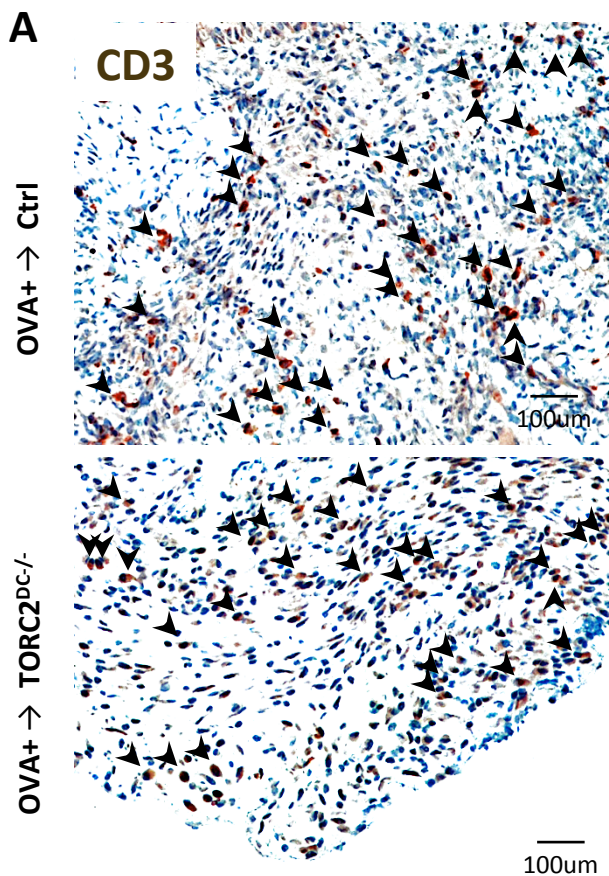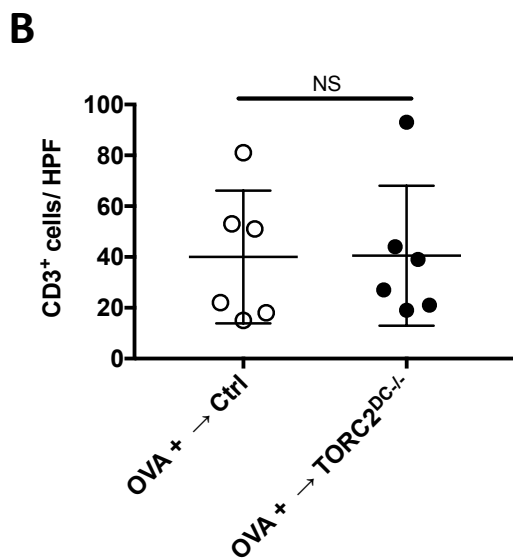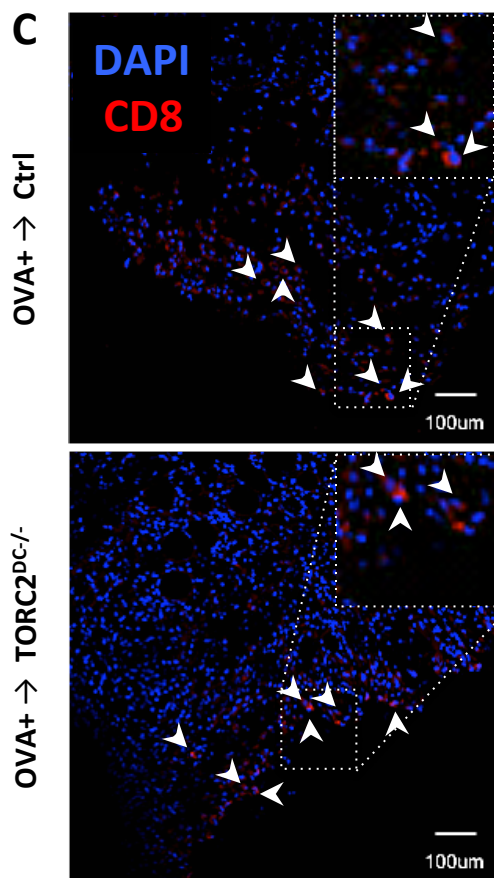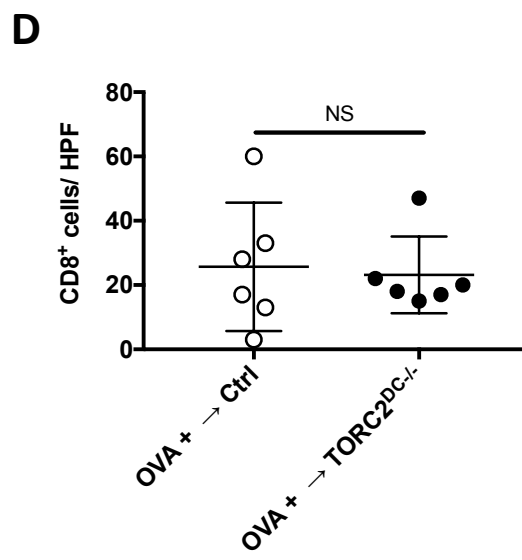



# Figure S5

**A**

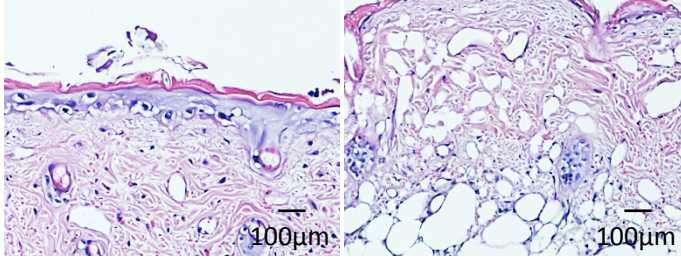

E-D; POD 7

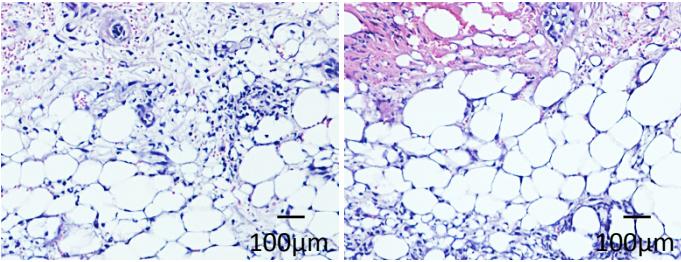

DD; POD 7

OVA + → WT Ctrl

OVA + → TORC2<sup>DC-/-</sup>

**B**

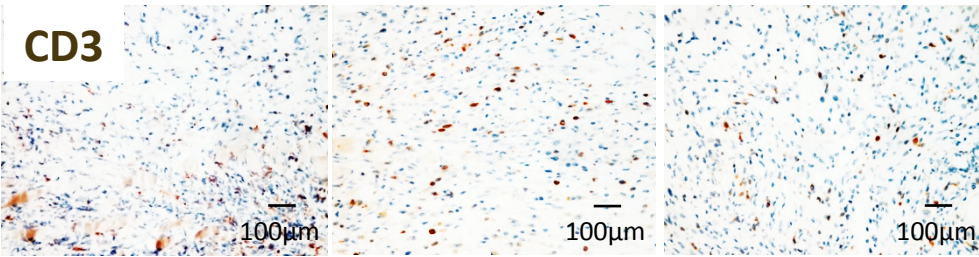

DD; POD 14

OVA - → WT Ctrl

OVA + → WT Ctrl

OVA + → TORC2<sup>DC-/-</sup>

**D**

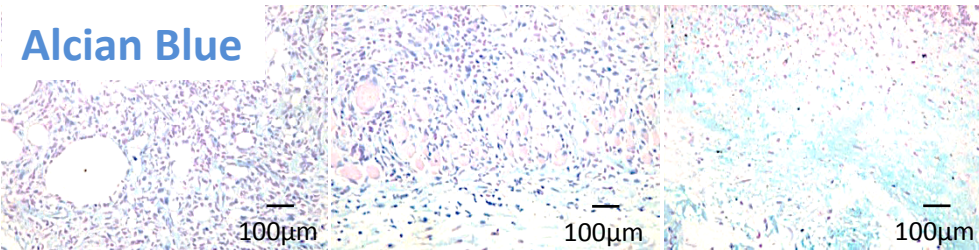

DD; POD 14

OVA - → WT Ctrl

OVA + → WT Ctrl

OVA + → TORC2<sup>DC-/-</sup>

**C**

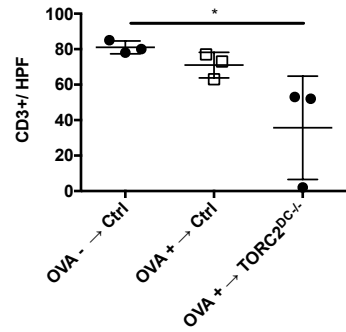

# Figure S6

## A

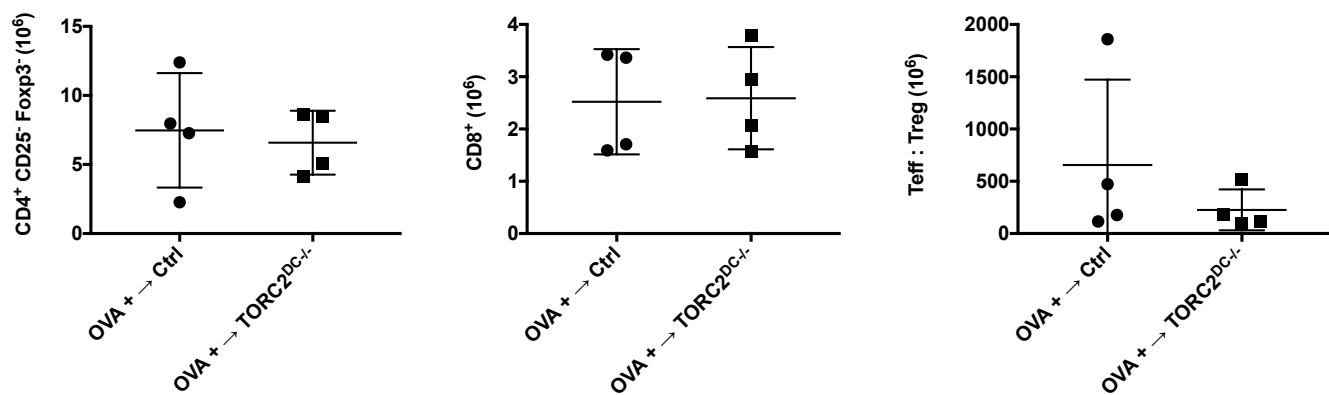

## B

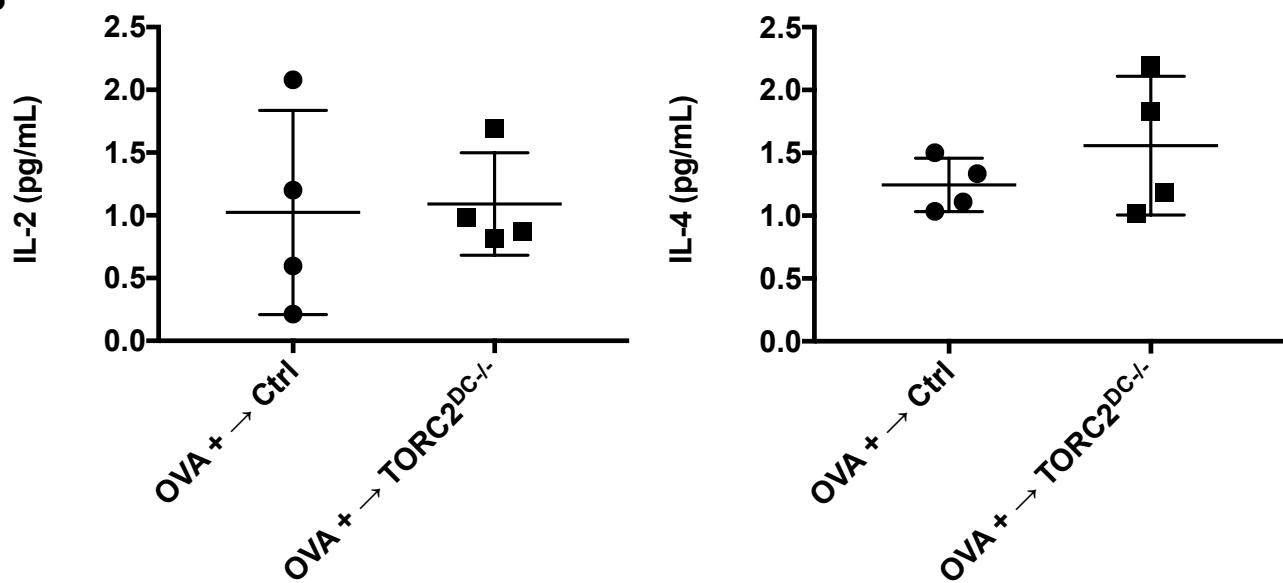

Supplement: NIHMS986342-supplement-Supp_figS1-6.pdf [file NIHMS986342-supplement-Supp_figS1-6.pdf]
